# Supplementary material for: A multicenter round robin test of PD-L1 expression assessment in urothelial bladder cancer by immunohistochemistry and RT-qPCR with emphasis on prognosis prediction after radical cystectomy
Source: PubMed Central journal article supplement (PMC5871092; doi:10.18632/oncotarget.24531), 2018-02-19
Supplement: oncotarget-09-15001-s001.pdf [file oncotarget-09-15001-s001.pdf]

# A multicenter round robin test of PD-L1 expression assessment in urothelial bladder cancer by immunohistochemistry and RT-qPCR with emphasis on prognosis prediction after radical cystectomy

## SUPPLEMENTARY MATERIALS

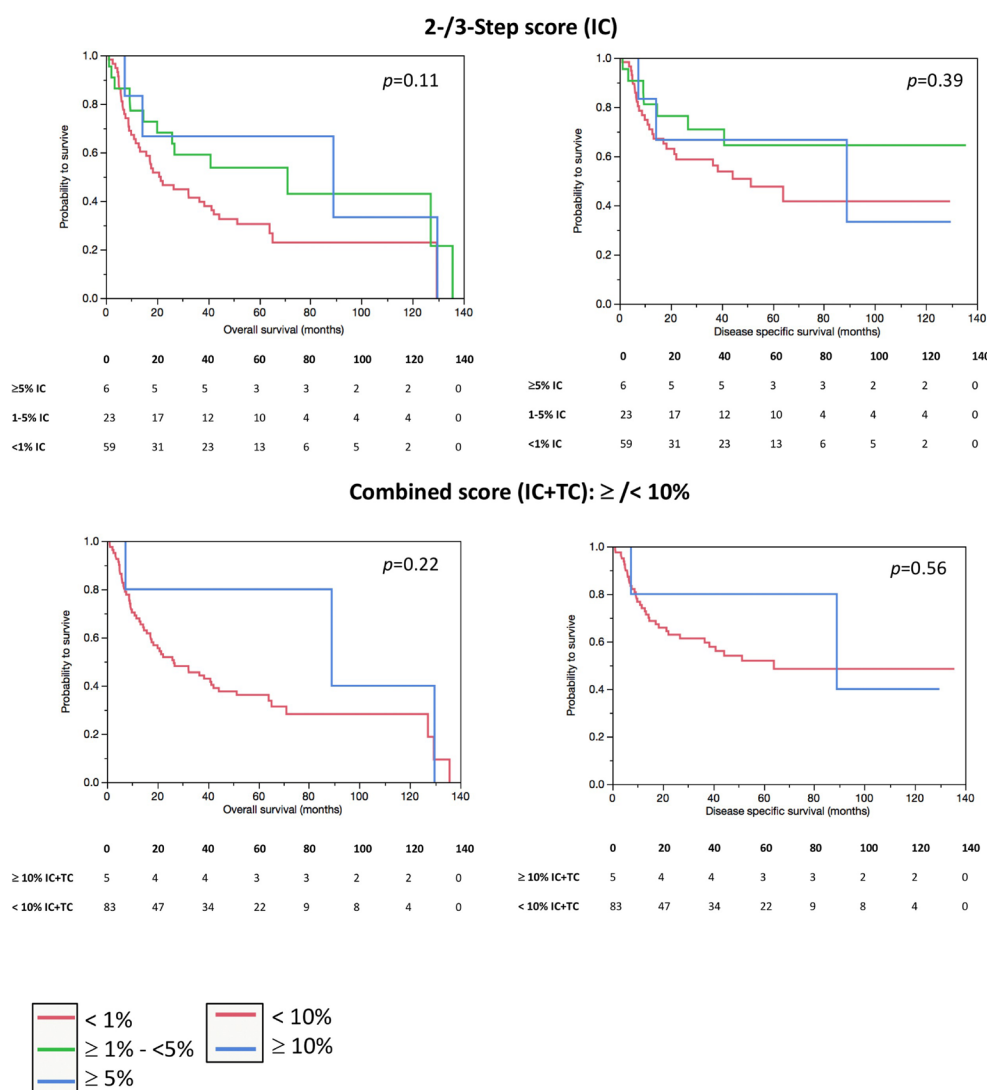

**Supplementary Figure 1: Kaplan-Meier-analysis of differential immunohistochemical cut-offs.** Kaplan-Meier-analysis for different IHC cut-offs which were utilized in clinical trials 9,12. For 2-/3-Step (IC scoring) and combined IC + TC cut-off there was no significant better prognosis in the high expression groups. No cut-off reached significance in the multivariate Weibull distribution model why no multivariate Cox regression analysis was performed (Supplementary Table 4).

**Supplementary Table 1: Immunohistochemical single case evaluation of each participating pathologist.** See Supplementary Table\_1

**Supplementary Table 2: Inter-center correlation of PD-L1 mRNA expression measurements**

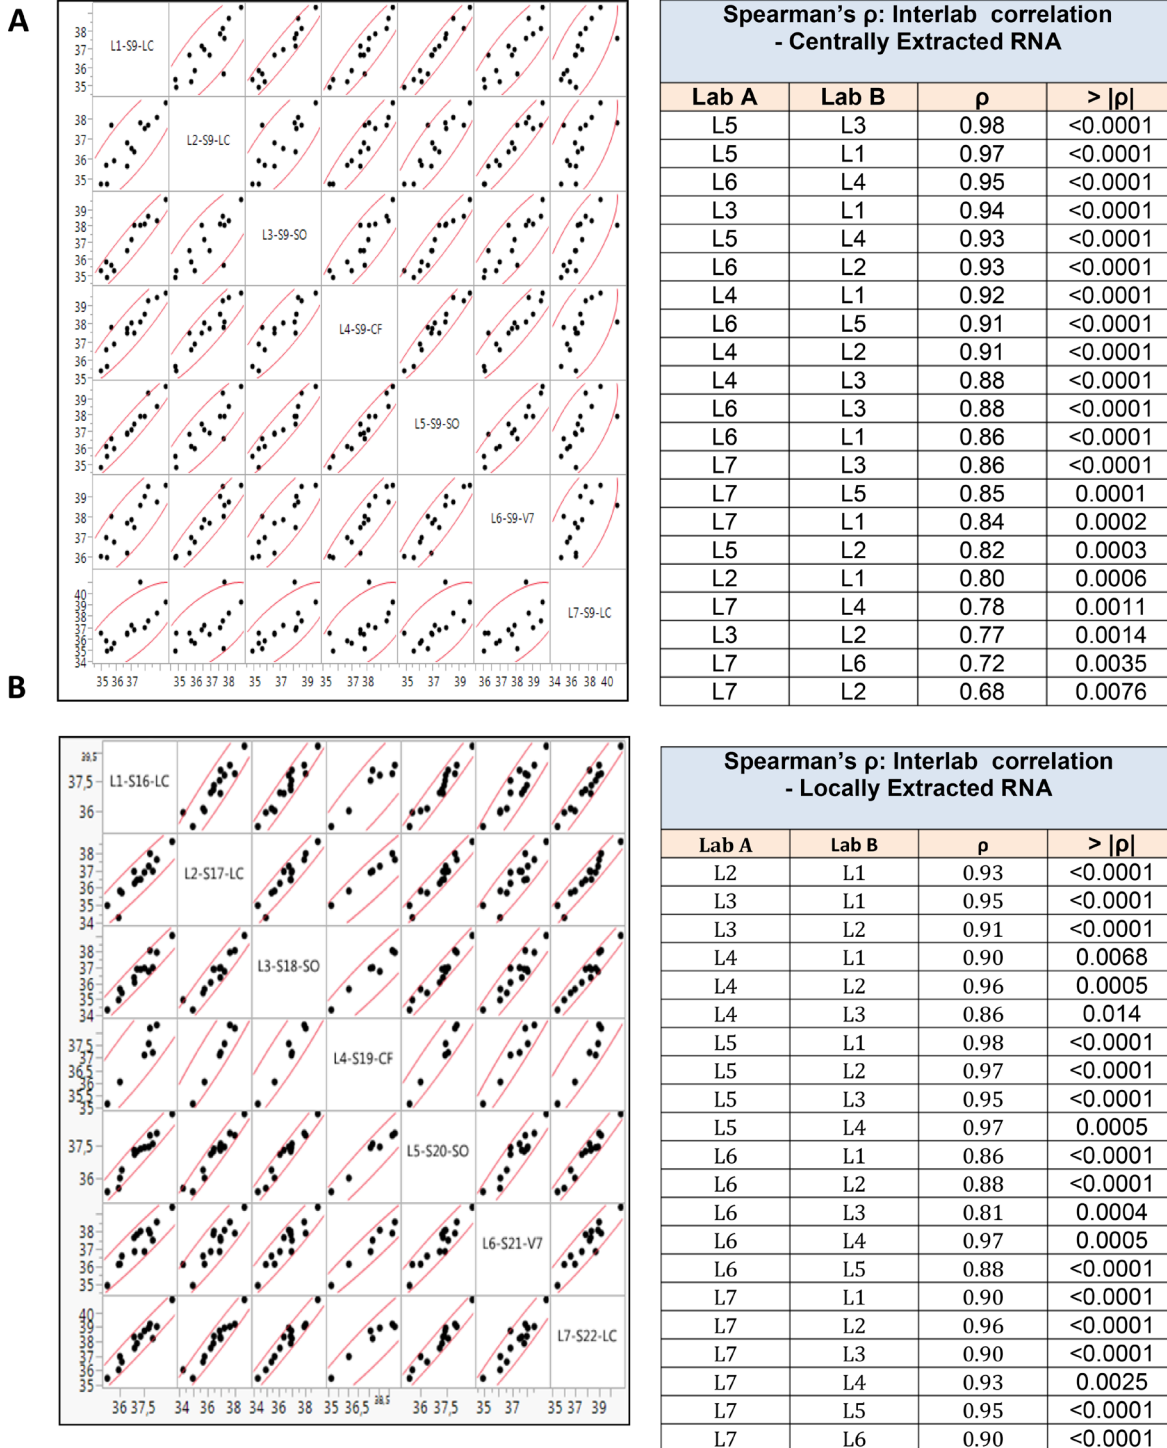

Measuring centrally (A) and locally (B) extracted RNA the most labs showed high intraclass correlation in pair comparisons (A:  $\rho = 0.68-0.98, p \leq 0.0076$ ; B:  $\rho = 0.81-0.98, p \leq 0.014$ ).

**Supplementary Table 3: Explicit graphical and numerical illustration of Bland-Altman-analysis of inter-center agreement**

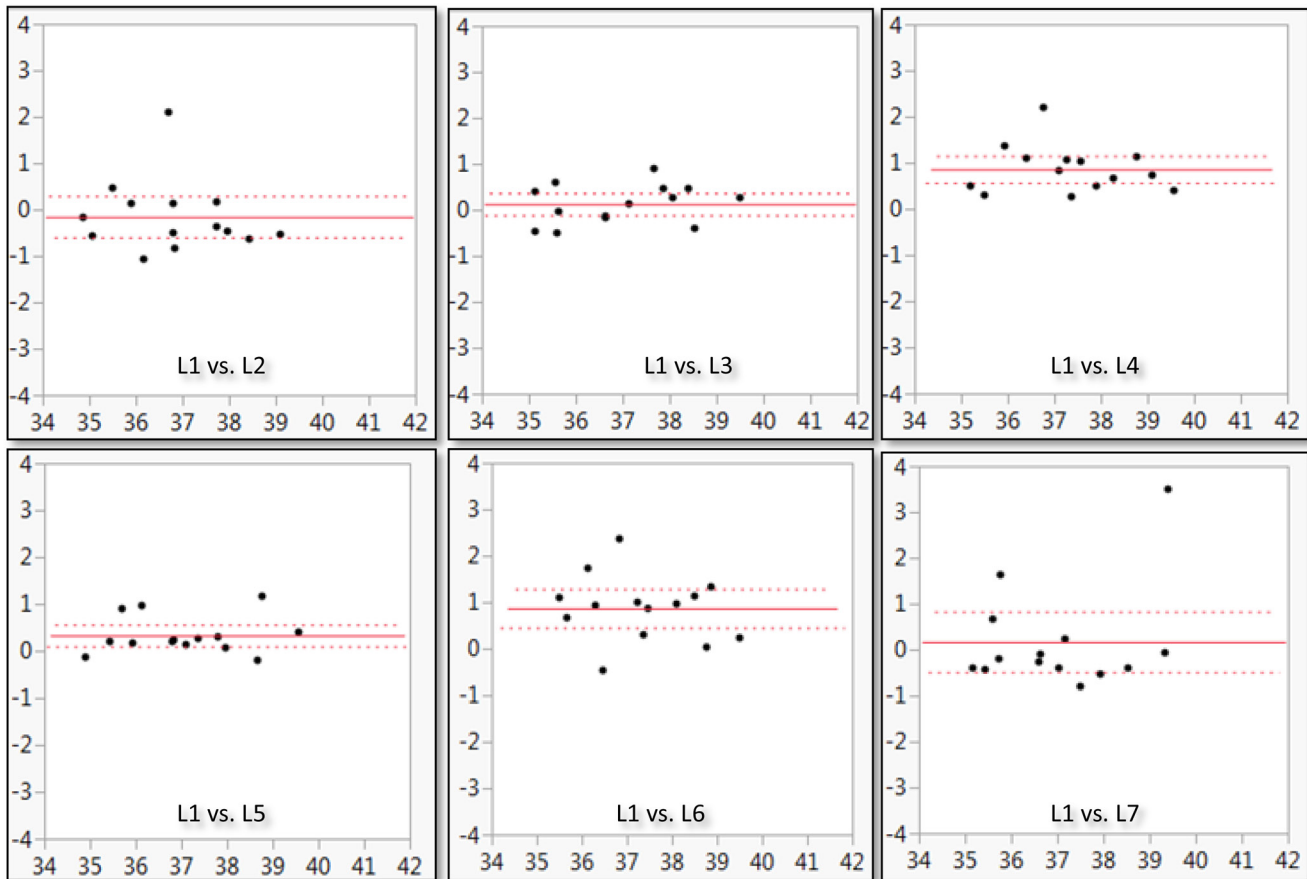

|                      | L1 vs. L2 | L1 vs. L3 | L1 vs. L4 | L1 vs. L5 | L1 vs. L6 | L1 vs. L7 |
|----------------------|-----------|-----------|-----------|-----------|-----------|-----------|
| n                    | 14        | 14        | 14        | 14        | 14        | 14        |
| Mean                 | 0.15      | -0.13     | -0.86     | -0.33     | -0.87     | -0.17     |
| Median               | 0.42      | -0.21     | -0.78     | -0.21     | -0.94     | 0.23      |
| Maximum              | 1.06      | 0.50      | -0.28     | 0.20      | 0.46      | 0.81      |
| Minimum              | -2.09     | -0.89     | -2.19     | -1.17     | -2.38     | -3.51     |
| Std. Deviation       | 0.77      | 0.42      | 0.51      | 0.40      | 0.72      | 1.14      |
| Std. Error           | 0.21      | 0.11      | 0.14      | 0.11      | 0.19      | 0.30      |
| Lower 95% CI of mean | -0.30     | -0.37     | -1.16     | -0.56     | -1.28     | -0.83     |
| Upper 95% CI of mean | 0.60      | 0.12      | -0.57     | -0.097    | -0.46     | 0.49      |

**Supplementary Table 4: Multivariate parametric Weibull-distribution analysis of mRNA expression and different immunohistochemical cut-offs.** See Supplementary\_Table\_4

**Supplementary Table 5: Intra-class correlation and inter-method concordance in the sensitivity validation cohort**

| <b>Cut-off</b> | <b>Light's <math>\kappa</math> (IC)</b> | <b>Light's <math>\kappa</math> (TC)</b> | <b>Light's <math>\kappa</math> (IC+TC)</b> |
|----------------|-----------------------------------------|-----------------------------------------|--------------------------------------------|
| $\geq < 1\%$   | 0.62                                    | 0.58                                    | 0.62                                       |
| $\geq < 5\%$   | 0.13                                    | 0.10                                    | 0.32                                       |
| $\geq < 10\%$  | 0.06                                    | 0.06                                    | 0.10                                       |
| 2/3-Step       | 0.52                                    | 0.49                                    | 0.39                                       |

  

| <b>B</b>    |                     |                                |                             |
|-------------|---------------------|--------------------------------|-----------------------------|
| <b>mRNA</b> | <b>IHC</b>          | <b>Spearman <math>r</math></b> | <b><math>p</math>-Value</b> |
| PD-L1 mRNA  | IC $\geq < 1\%$     | 0.67                           | $< 0.0001$                  |
| PD-L1 mRNA  | IC $\geq < 5\%$     | 0.26                           | 0.015                       |
| PD-L1 mRNA  | IC $\geq < 10\%$    | 0.18                           | 0.094                       |
| PD-L1 mRNA  | 2/3-Step            | 0.66                           | $< 0.0001$                  |
| PD-L1 mRNA  | TC $\geq < 1\%$     | 0.64                           | $< 0.0001$                  |
| PD-L1 mRNA  | TC $\geq < 5\%$     | 0.23                           | 0.028                       |
| PD-L1 mRNA  | TC $\geq < 10\%$    | 0.18                           | 0.094                       |
| PD-L1 mRNA  | 2/3-Step            | 0.63                           | $< 0.0001$                  |
| PD-L1 mRNA  | IC+TC $\geq < 1\%$  | 0.67                           | $< 0.0001$                  |
| PD-L1 mRNA  | IC+TC $\geq < 5\%$  | 0.43                           | $< 0.0001$                  |
| PD-L1 mRNA  | IC+TC $\geq < 10\%$ | 0.23                           | 0.028                       |
| PD-L1 mRNA  | 2/3-Step            | 0.66                           | $< 0.0001$                  |

  

| <b>mRNA</b>           | <b>IHC</b>                 | <b>Spearman <math>r</math></b> | <b><math>p</math>-Value</b> |
|-----------------------|----------------------------|--------------------------------|-----------------------------|
| Continuous PD-L1 mRNA | Continuous IC scoring      | 0.59                           | $< 0.0001$                  |
| Continuous PD-L1 mRNA | Continuous TC scoring      | 0.59                           | $< 0.0001$                  |
| Continuous PD-L1 mRNA | Continuous IC + TC scoring | 0.55                           | $< 0.0001$                  |

Agreement and intra-class correlation analysis in the independent validation cohort ( $n = 88$ ). **(A)** Light's Kappa Analysis for PD-L1 mRNA  $\geq < 36.5$  40- $\Delta$ CT versus various IHC cut-offs. Agreement is moderate to substantial for IC/TC  $\geq < 1\%$  cut-off. For other cut-offs agreement ranges from slight to fair. **(B)** Spearman correlations PD-L1 mRNA  $\geq < 36.5$  40- $\Delta$ CT versus various IHC cut-offs. The intra-class correlations are especially high for  $\geq < 1\%$  cut-offs and for the 2/3-Step cut-off utilized in the IMvigor trials 1,2. Continuous PD-L1 mRNA expression and continuous PD-L1 scoring also show a high inter-method correlation
